# Supplementary material
Source: Springer Nature journal article supplement (https://www.springermedizin.de/resource/supplementary/12879_2011_1884_MOESM7_ESM.pdf/9443992)

Controls

Electrode : Cz

Pneumococcal Meningitis

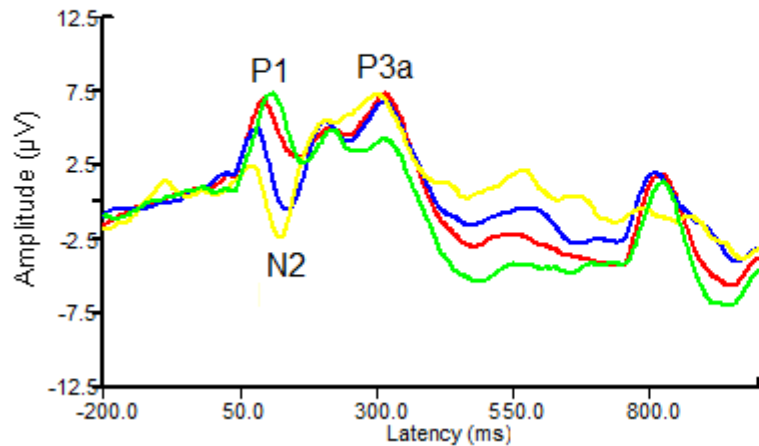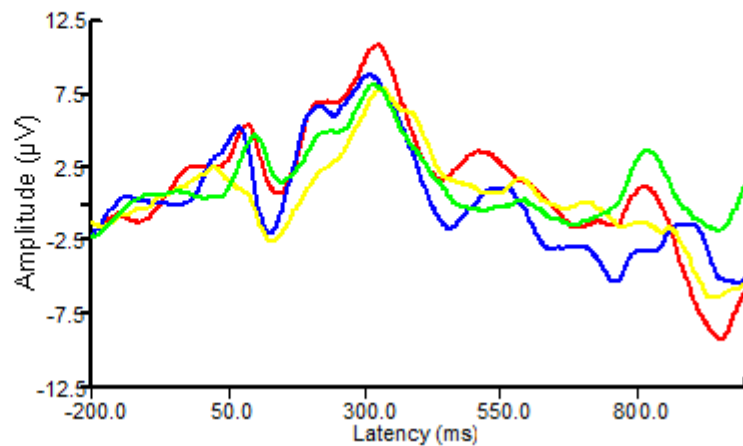

Supplement: MOESM7 [file 9443992]
